# Supplementary material for: Three new species of entimine weevils in Early Miocene amber from the Dominican Republic (Coleoptera: Curculionidae)
Source: PubMed Central journal article supplement (PMC5345054; doi:10.3897/bdj.5.e10469), 2017-02-03

| Nodes    |   |
|----------|---|
| 2009     | 2 |
| 2017     | 3 |
| 2012     | 2 |
| Edges    |   |
| isa_2017 | 2 |
| isa_2009 | 1 |
| isa_2012 | 1 |
| Art.     | 2 |

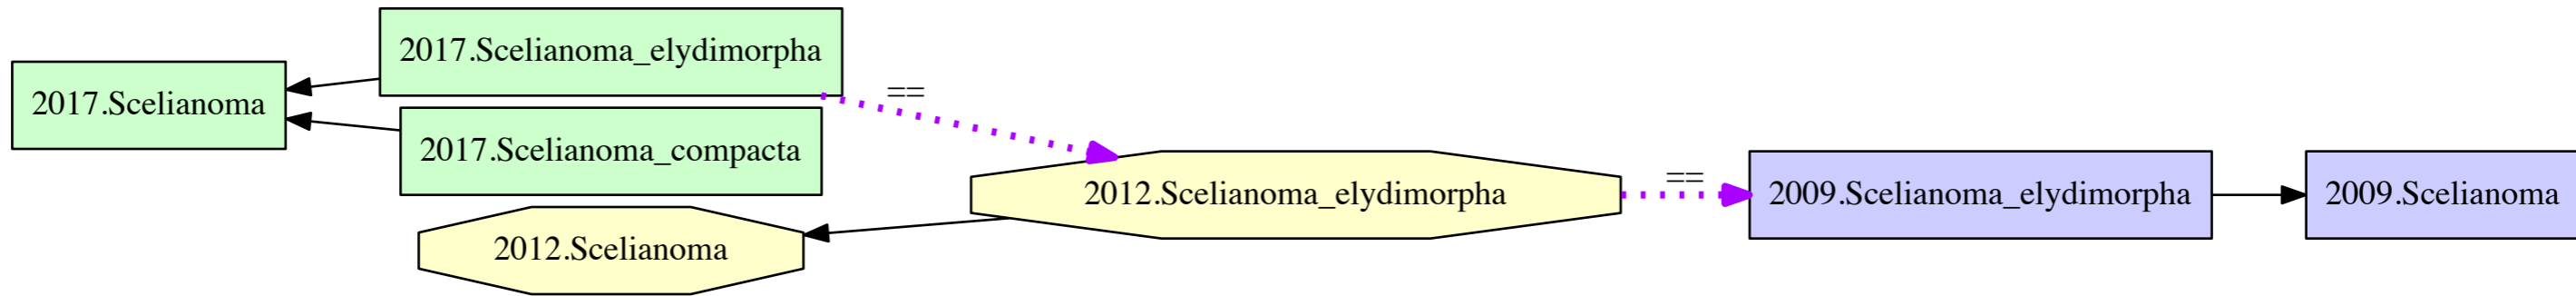

Supplement: bdj-05-e10469-s004.pdf [file bdj-05-e10469-s004.pdf]
