# Supplementary material for: Three new species of entimine weevils in Early Miocene amber from the Dominican Republic (Coleoptera: Curculionidae)
Source: PubMed Central journal article supplement (PMC5345054; doi:10.3897/bdj.5.e10469), 2017-02-03
Supplement: bdj-05-e10469-s005.pdf [file bdj-05-e10469-s005.pdf]

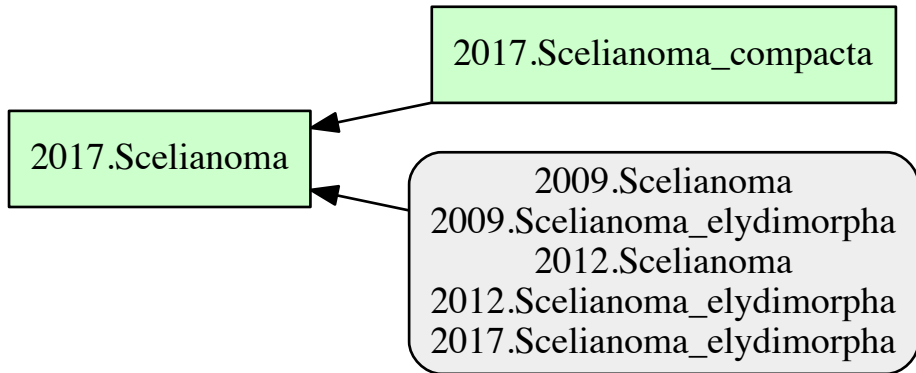

| <b>Nodes</b> |   |
|--------------|---|
| 2017         | 2 |
| comb         | 1 |
| <b>Edges</b> |   |
| input        | 2 |
