# Supplementary material for: Three new species of entimine weevils in Early Miocene amber from the Dominican Republic (Coleoptera: Curculionidae)
Source: PubMed Central journal article supplement (PMC5345054; doi:10.3897/bdj.5.e10469), 2017-02-03

| Nodes    |    |
|----------|----|
| 1999     | 23 |
| 2017     | 3  |
| 2001     | 17 |
| 1982     | 20 |
| 2012     | 10 |
| Edges    |    |
| isa_1982 | 19 |
| isa_1999 | 22 |
| isa_2001 | 16 |
| isa_2017 | 2  |
| Art.     | 75 |
| isa_2012 | 9  |

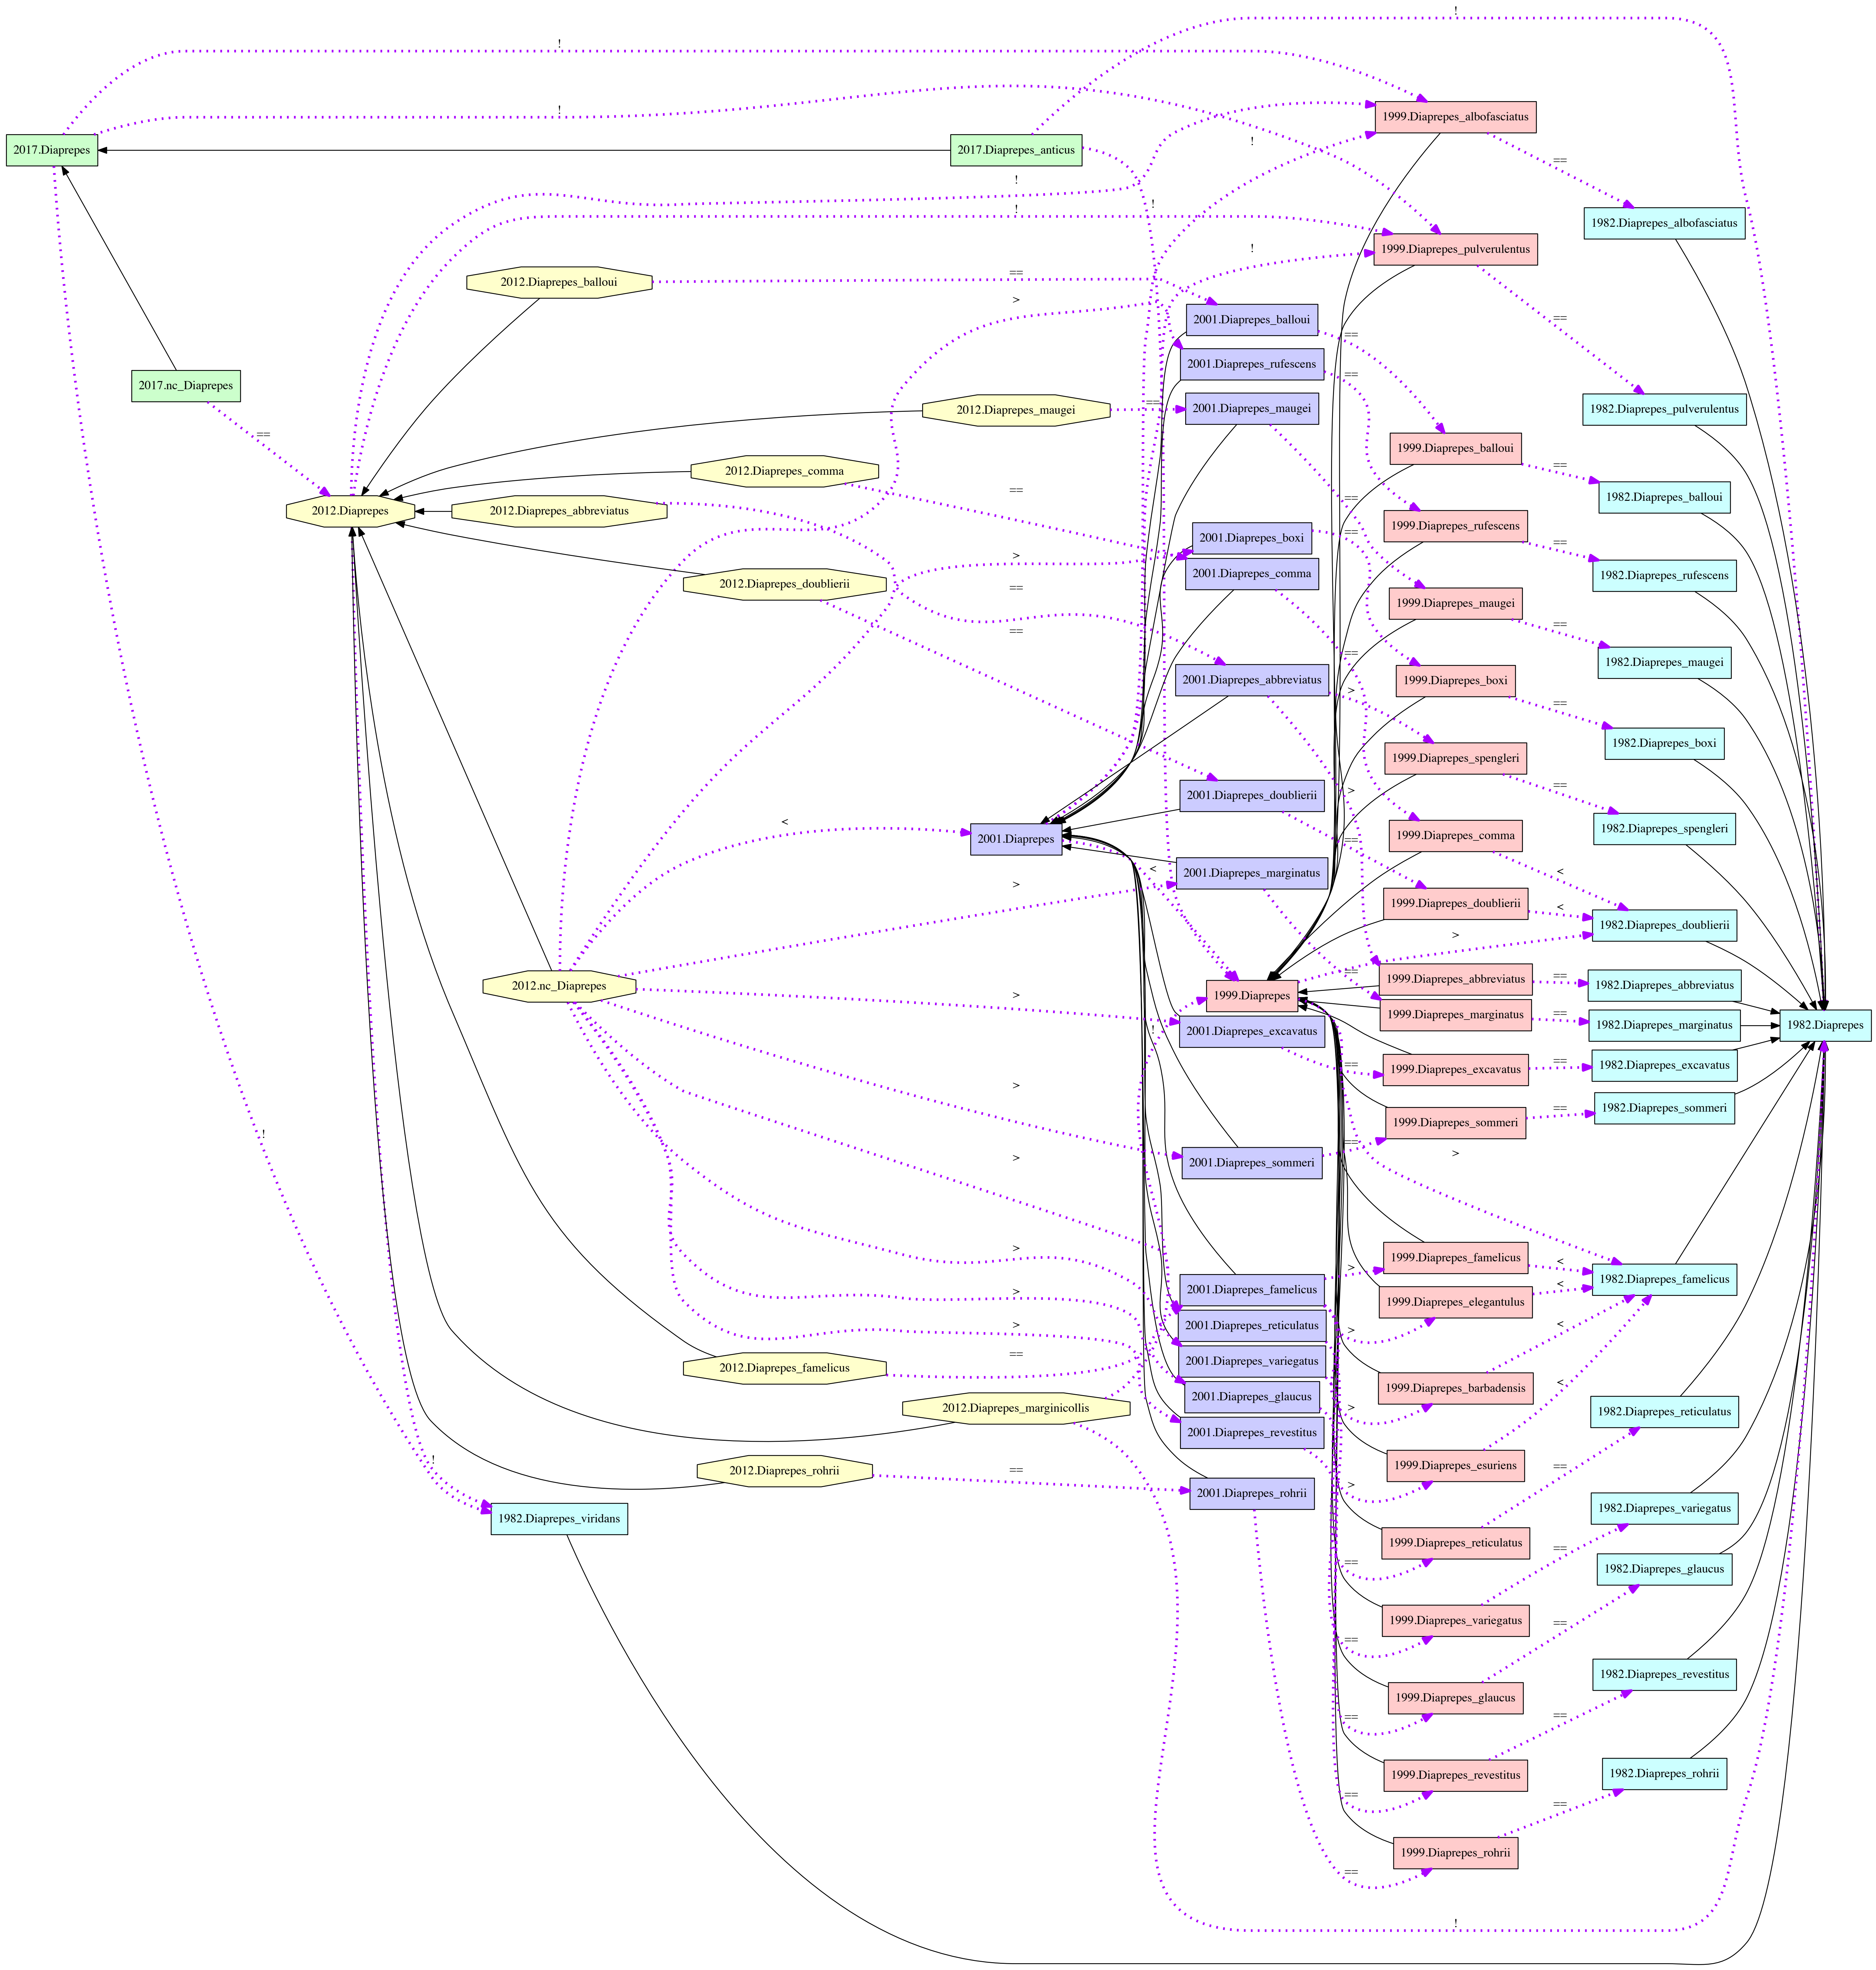

Supplement: bdj-05-e10469-s012.pdf [file bdj-05-e10469-s012.pdf]
