# Supplementary material for: Three new species of entimine weevils in Early Miocene amber from the Dominican Republic (Coleoptera: Curculionidae)
Source: PubMed Central journal article supplement (PMC5345054; doi:10.3897/bdj.5.e10469), 2017-02-03
Supplement: bdj-05-e10469-s013.pdf [file bdj-05-e10469-s013.pdf]

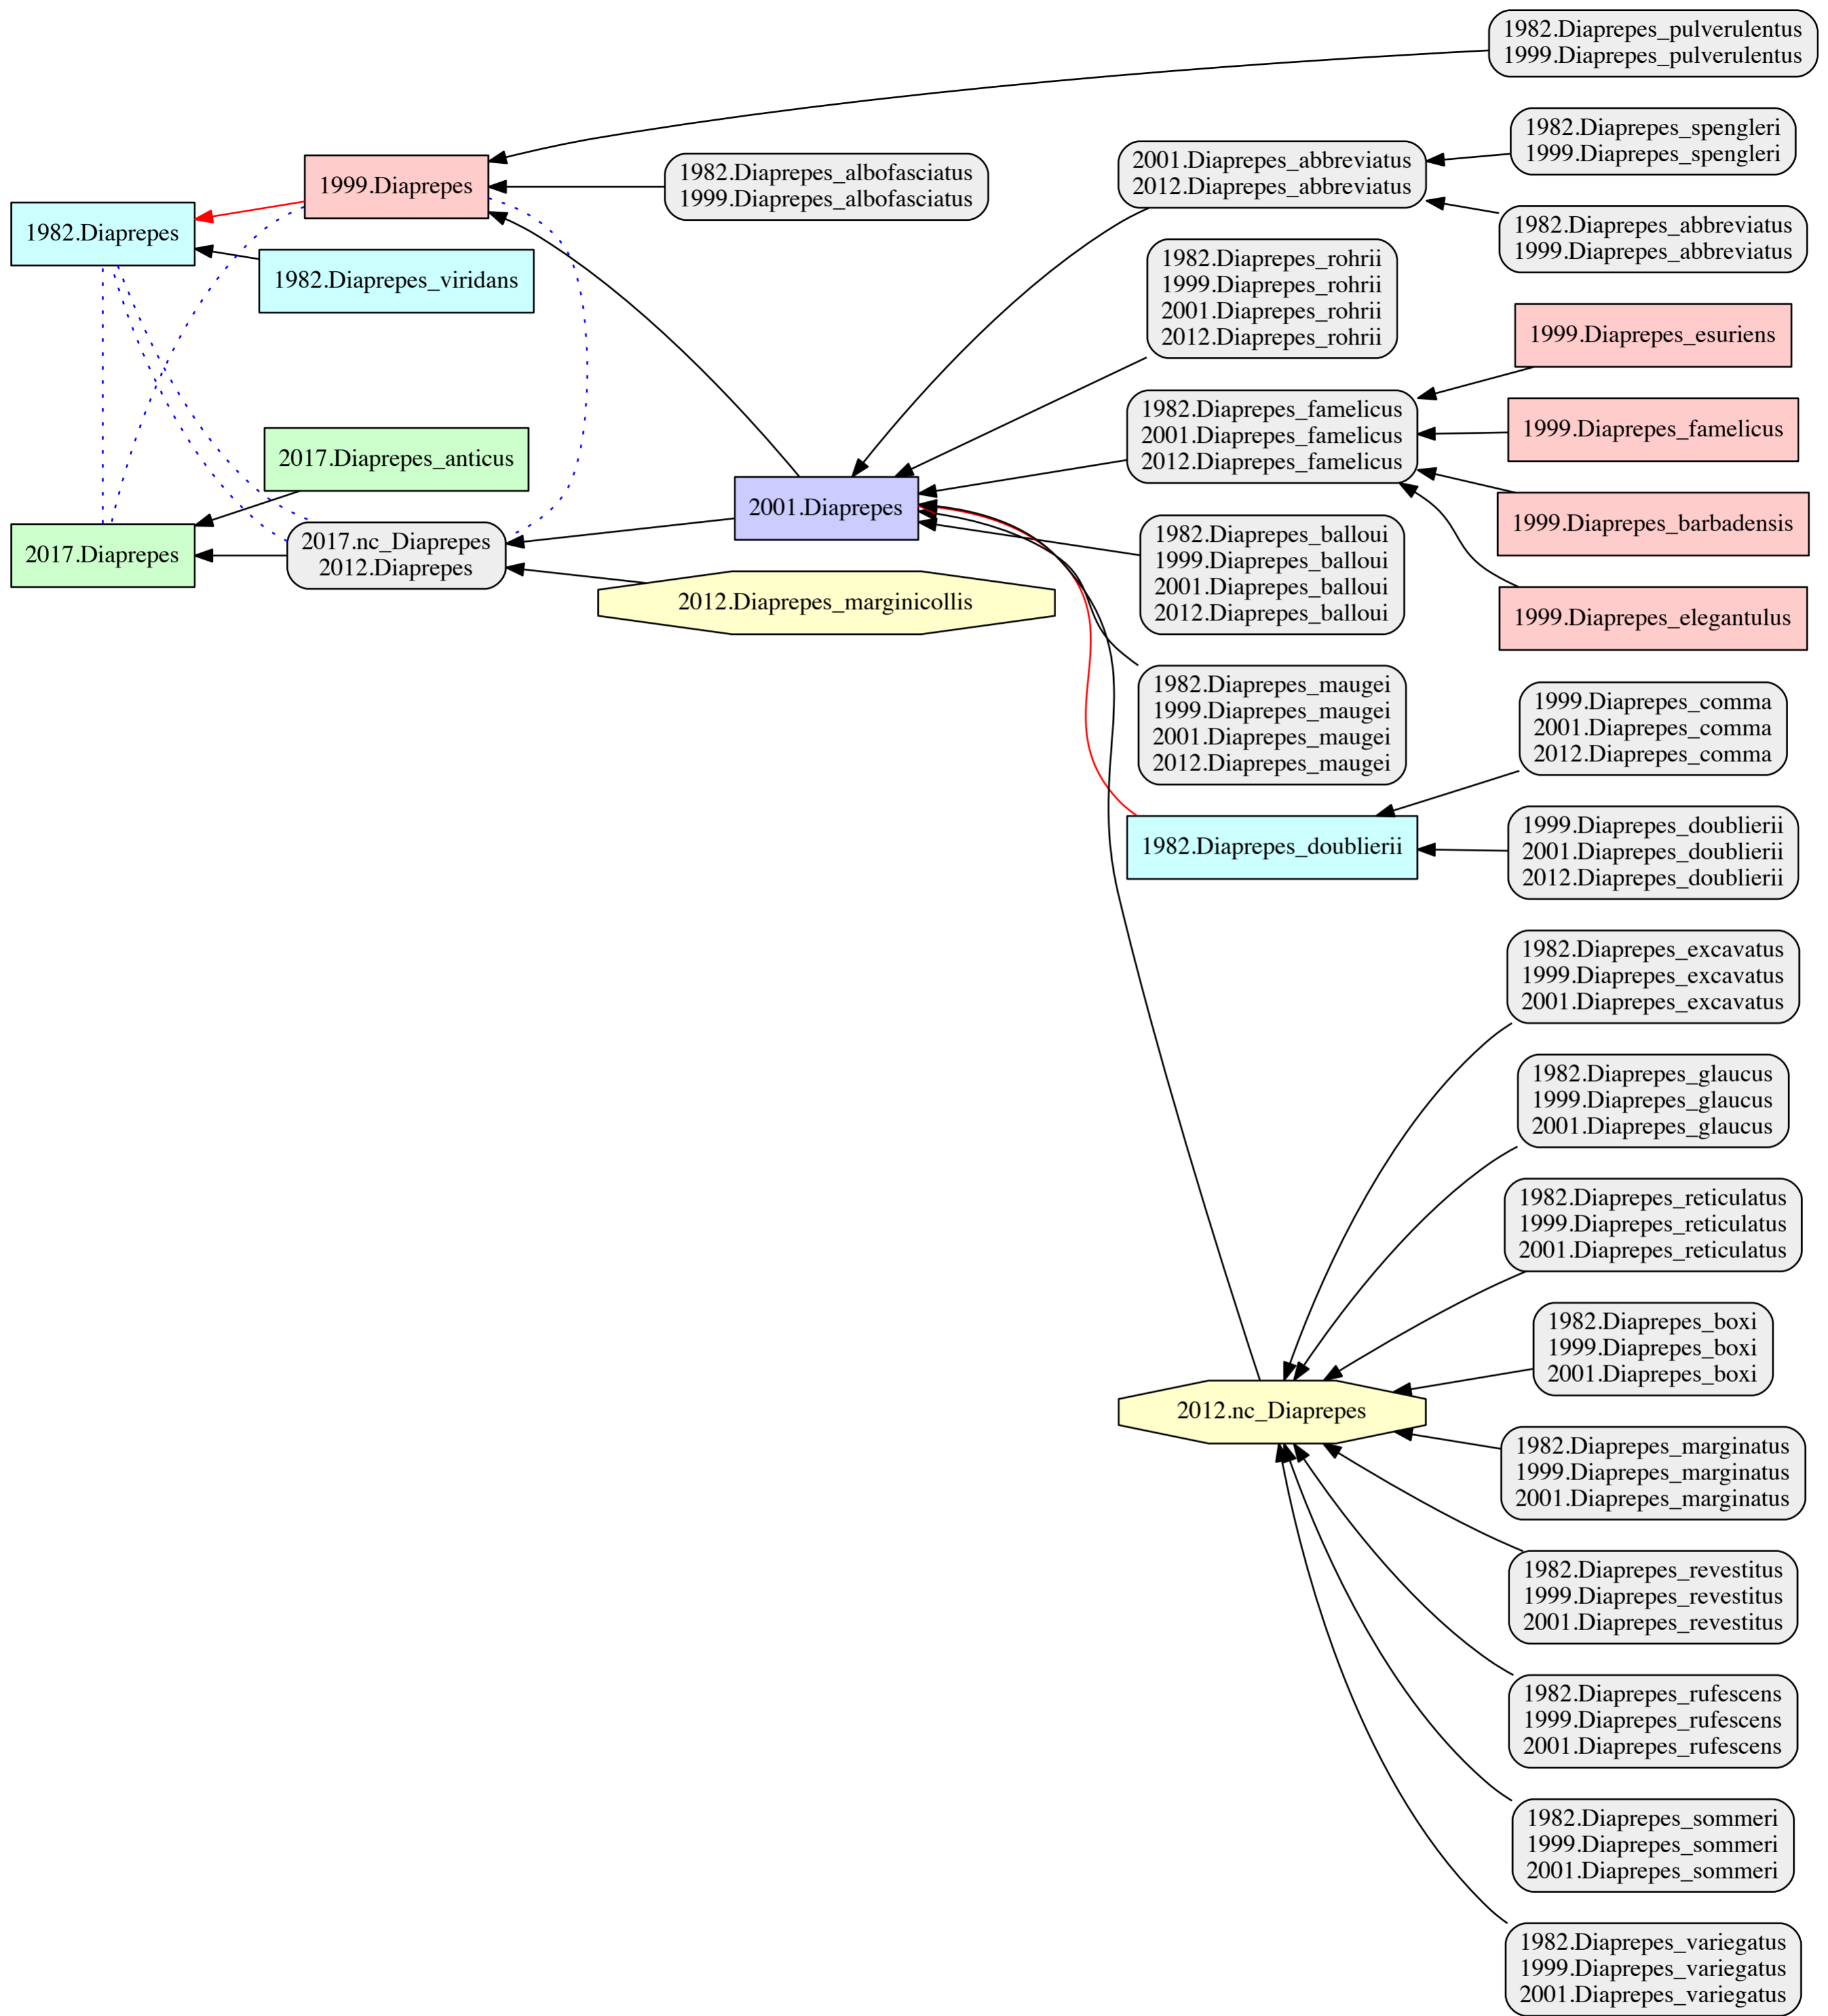

| Nodes    |    |
|----------|----|
| comb     | 21 |
| 1982     | 3  |
| 1999     | 5  |
| 2001     | 1  |
| 2017     | 2  |
| 2012     | 2  |
| Edges    |    |
| overlaps | 5  |
| input    | 31 |
| inferred | 2  |
